# Supplementary material
Source: Research Square preprint supplement (doi:10.21203/rs.3.rs-9010687/v1)
Supplement: Supplementary file 1 [file 8298e8f431f2a89033e8deac.docx]

**Supplement table 1. Comparison of mycophenolate dosing between elderly and young re-KT recipients in the total population**

|  | Low  (<1,500mg) | Intermediate  (1,500-3,000mg) | High  (≥3,000mg) | *p*-value |
| --- | --- | --- | --- | --- |
| At discharge |  |  |  | 0.535 |
| Young (n=877) | 444 (50.6%) | 430 (49.0%) | 3 (0.3%) |  |
| Elderly (n=46) | 27 (58.7%) | 19 (41.3%) | 0 (0.0%) |  |
| At 6 months |  |  |  | 0.376 |
| Young (n=652) | 523 (80.2%) | 127 (19.5%) | 2 (0.3%) |  |
| Elderly (n=24) | 22 (91.7%) | 2 (8.3%) | 0 (0.0%) |  |
| At 1 year |  |  |  | 0.949 |
| Young (n=636) | 533 (83.8%) | 102 (16.0%) | 1 (0.2%) |  |
| Elderly (n=22) | 18 (81.8%) | 4 (18.2%) | 0 (0.0%) |  |
| At 2 year |  |  |  | 0.752 |
| Young (n=577) | 484 (83.9%) | 93 (16.1%) | 0 (0.0%) |  |
| Elderly (n=19) | 17 (89.5%) | 2 (10.5%) | 0 (0.0%) |  |
| At 3 year |  |  |  | 0.689 |
| Young (n=510) | 442 (86.7%) | 68 (13.3%) | 0 (0.0%) |  |
| Elderly (n=13) | 11 (84.6%) | 2 (15.4%) | 0 (0.0%) |  |
| At 4 year |  |  |  | 0.225 |
| Young (n=417) | 371 (89.0%) | 46 (11.0%) | 0 (0.0%) |  |
| Elderly (n=8) | 6 (75.0%) | 2 (25.0%) | 0 (0.0%) |  |
| At 5 year |  |  |  | 0.384 |
| Young (n=278) | 247 (88.8%) | 31 (11.2%) | 0 (0.0%) |  |
| Elderly (n=4) | 3 (75.0%) | 1 (25.0%) | 0 (0.0%) |  |
| At 6 year |  |  |  | 1.000 |
| Young (n=174) | 157 (90.2%) | 17 (9.8%) | 0 (0.0%) |  |
| Elderly (n=1) | 1 (100.0%) | 0 (0.0%) | 0 (0.0%) |  |
| At 7 year |  |  |  | 1.000 |
| Young (n=120) | 108 (90.0%) | 12 (10.0%) | 0 (0.0%) |  |
| Elderly (n=1) | 1 (100.0%) | 0 (0.0%) | 0 (0.0%) |  |

Re-KT, kidney retransplantaion


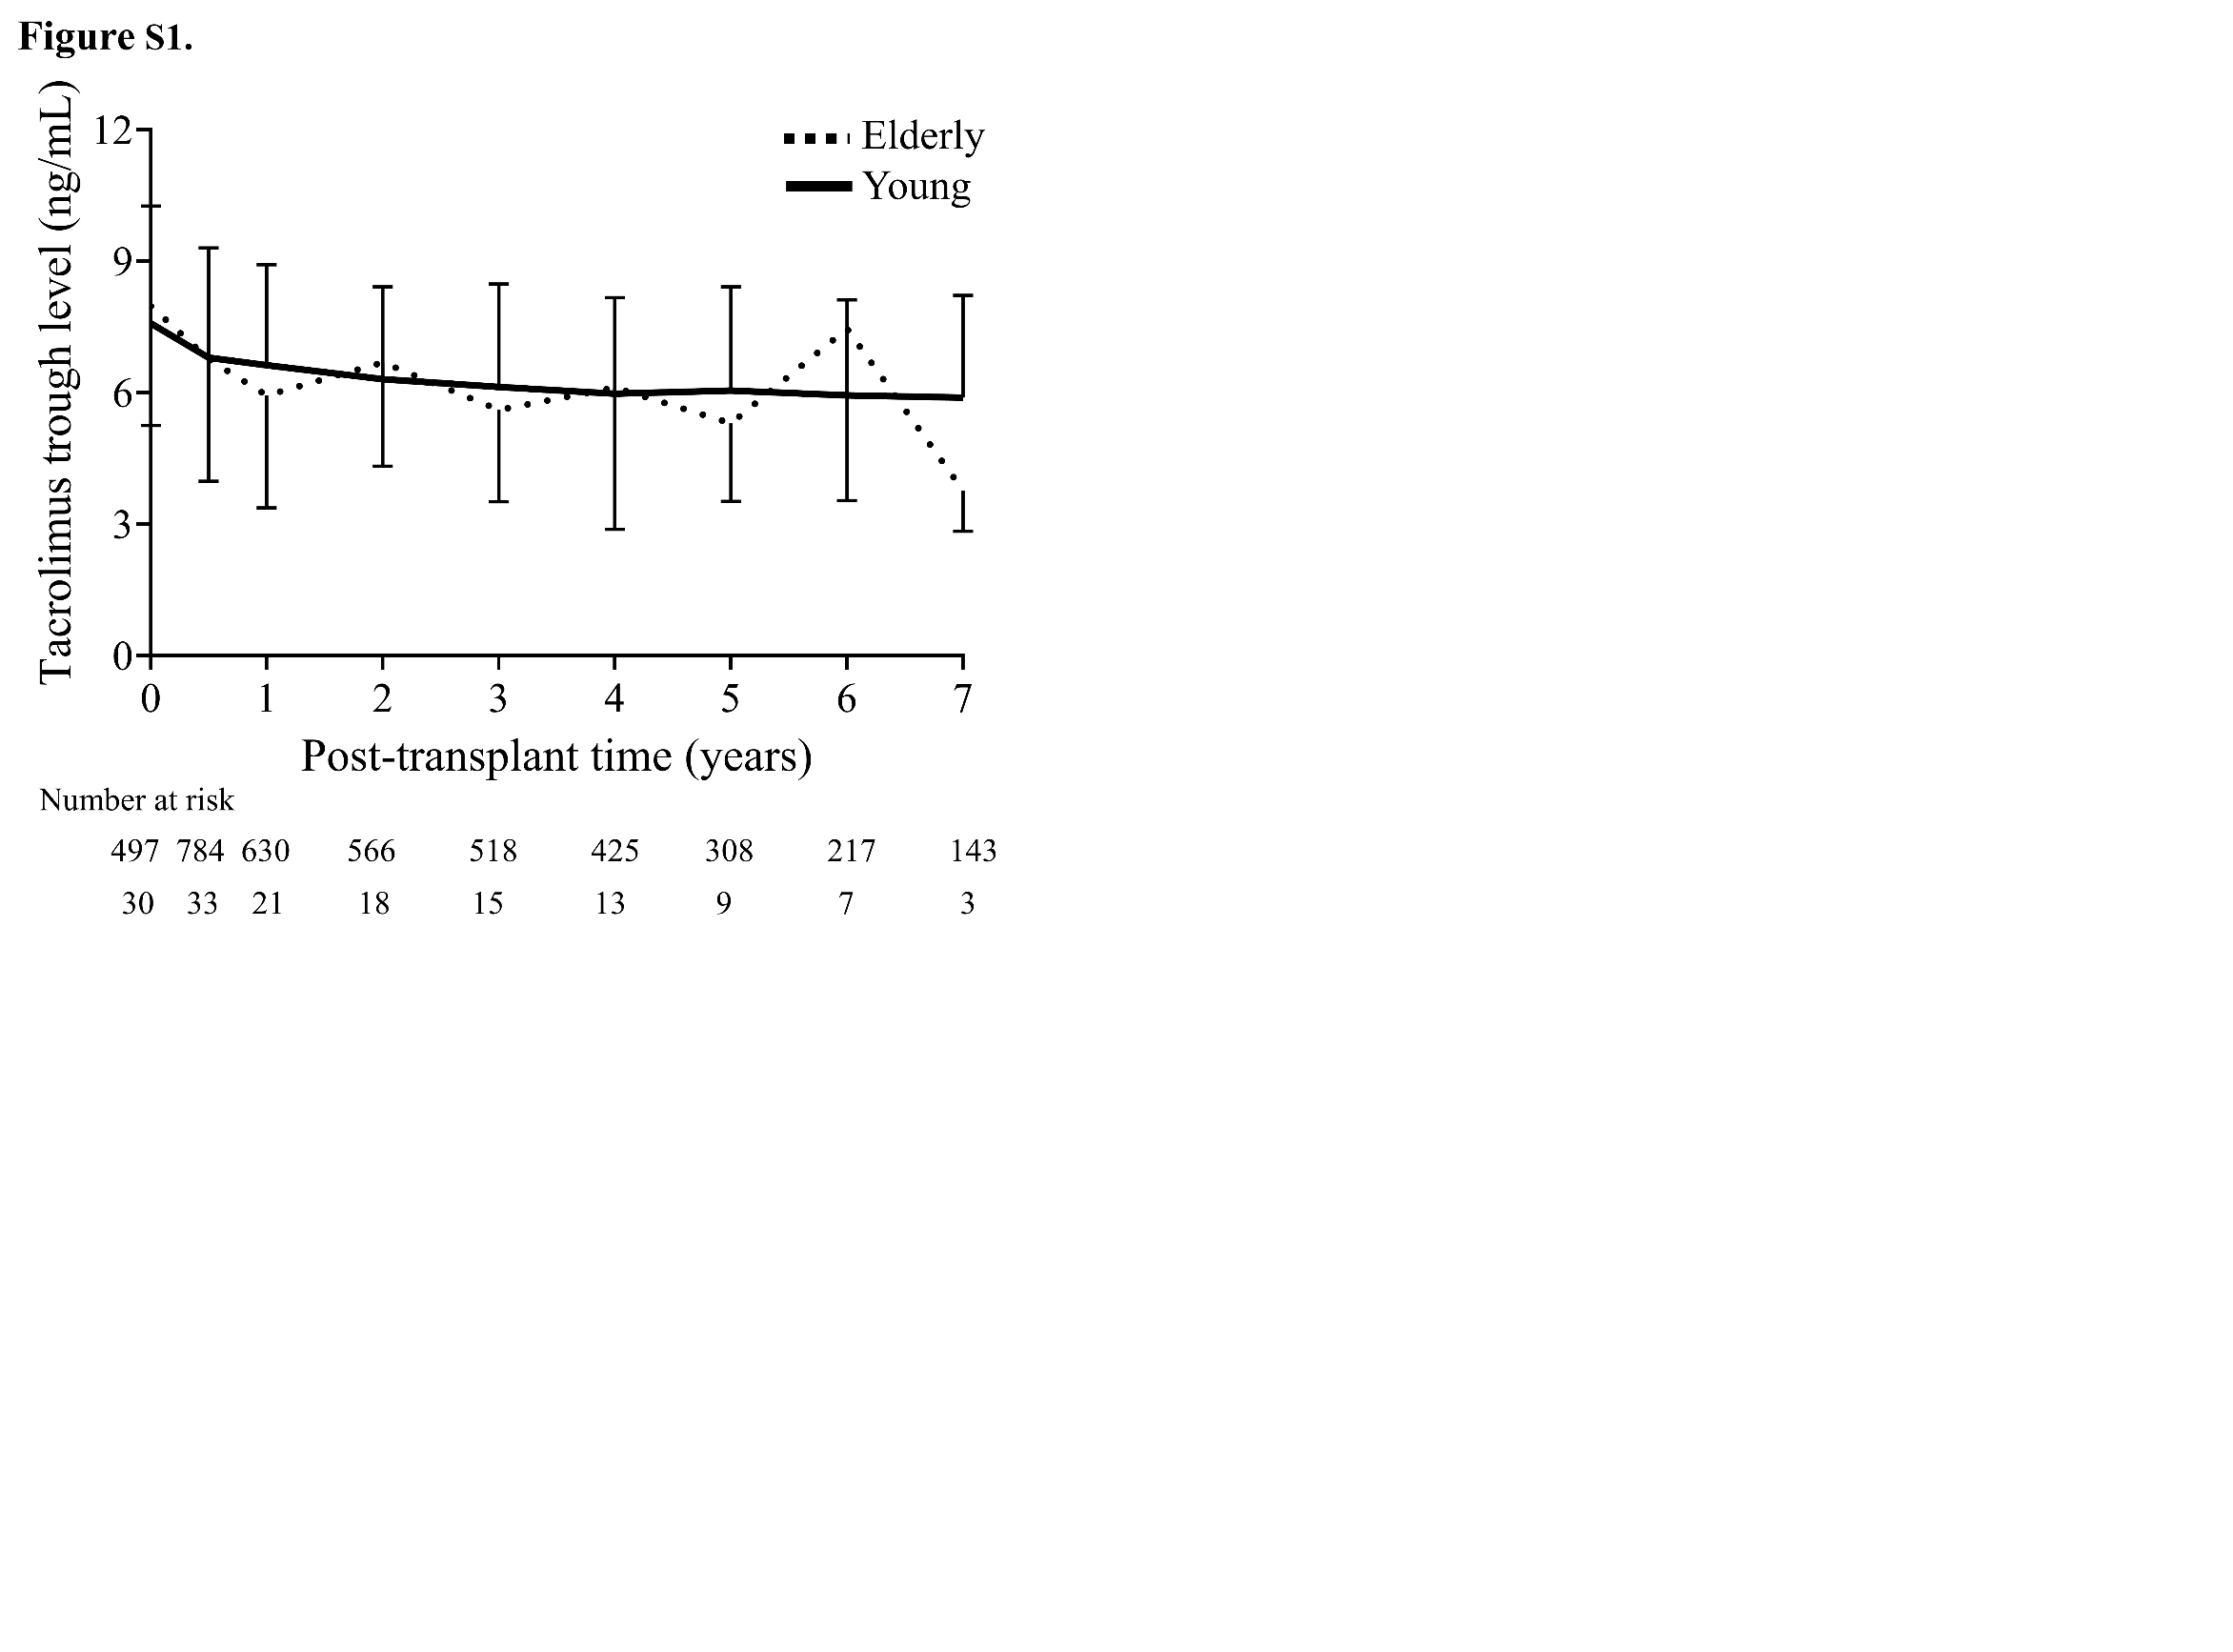


**Supplement figure 1. Comparison of mean tacrolimus trough levels (mg/mL) between elderly and young re-KT recipients in the total population**

Re-KT, kidney retransplantaion
