# Supplementary material
Source: Research Square preprint supplement (doi:10.21203/rs.3.rs-9010687/v1)
Supplement: Supplementary file 2 [file ca1e50c69450d458207f1d48.docx]

**Appendix**

**The Korean Organ Transplantation Registry Study Group**

**Cheol Woong Jung8, Jun Young Lee9, Yeong Hoon Kim10, Joong Kyung Kim11, Chan-Duck Kim12, Eun Jeoung Ko13, Sik Lee14, Yeon Ho Park15, Su Hyung Lee16, Jae Berm Park17, Jung Hwan Park18, Seok Hui Kang19, Tae Hyun Ban20, Sang Heon Song21, Seung Hwan Song22, Ho Sik Shin23, Ki-Ryang Na24, Dong Ryeol Lee25, Dong Won Lee26, Jieun Oh27, Su Woong Jung28, Yu Ho Lee29, Hyejin Mo30, Jeong-Hoon Lee31, Jin Seok Jeon32, Sang Youb Han33, Jin Sug Kim34, Jong Soo Lee35, Man Ki Ju36, Jong Cheol Jeong37, Soo Jin Na Choi38, Sung Shin39, Seungyeup Han40, Kyu Ha Huh41, Seun Deuk Hwang42, Sangil Min43**

8 Department of Surgery, Korea University Anam Hospital

9 Department of Nephrology, Yonsei University Wonju College of Medicine, Wonju Severance Christian Hospital

10 Department of Internal Medicine, Inje University Busan Paik Hospital

11 Department of Internal Medicine, Bongseng Memorial Hospital

12 Department of Internal Medicine, School of Medicine, Kyungpook National University Hospital

13 Division of Nephrology, Department of Internal Medicine, Bucheon St. Mary's Hospital

14 Department of Internal Medicine, Jeonbuk National University Hospital

15 Department of Surgery, Gil Medical Center, Gachon University College of Medicine

16 Department of Surgery, Ajou University School of Medicine

17 Department of Surgery, Samsung Medical Center, Sungkyunkwan University School of Medicine

18 Konkuk University School of Medicine, Department of Nephrology

19 Department of Nephrology, Yeungnam University Hospital

20 Division of Nephrology, Department of Internal Medicine, Eunpyeong St. Mary's hospital

21 Department of Internal Medicine, Pusan National University Hospital

22 Department of Surgery, Ewha Womans University Seoul Hospital

23 Kosin University College of Medicine, Department of Internal Medicine, Division of Nephrology

24 Department of Nephrology, Chungnam National University Hospital

25 Division of Nephrology, Department of Internal Medicine, Maryknoll Medical Center

26 Division of Nephrology, Department of Internal Medicine, Pusan National University School of Medicine

27 Department of Internal Medicine, Kangdong Sacred Heart Hospital, Hallym University College of Medicine

28 Division of Nephrology, Department of Internal Medicine, College of Medicine, Kyung Hee University

29 Division of Nephrology, Department of Internal Medicine, CHA Bundang Medical Center, CHA University, Seongnam, Korea

30 Department of Surgery, SMG-SNU Boramae Medical Center

31 Department of Surgery, Myongji Hospital

32 Department of Internal Medicine, Soonchunhyang University Seoul Hospital

33 Division of Nephrology, Inje University Ilsan-Paik Hospital

34 Division of Nephrology, Department of Internal Medicine, College of Medicine, Kyung Hee University Hospital, Kyung Hee University

35 Department of Surgery, Ulsan University Hospital

36 Department of Surgery, Gangnam Severance Hospital, Yonsei University College of Medicine

37 Department of Internal Medicine, Seoul National University Bundang Hospital

38 Department of Surgery, Chonnam National University Medical School

39 Department of Surgery, Asan Medical Center

40 Department of Internal Medicine, Keimyung University School of Medicine, Daegu, Korea

41 Department of Transplantation Surgery, Severance Hospital, Yonsei University College of Medicine

42 Department of internal medicine of nephrology, Inha university hospital, The Inha University of Korea, College of Medicine

43 Department of Surgery, Seoul National University Hospital
